# Supplementary material for: Lifespan investigation of brain volumetric changes associated with substance use disorders
Source: Research Square preprint supplement (doi:10.21203/rs.3.rs-6864753/v1), 2025-06-26
Supplement: Supplementary file 1 [file 30cb89b91ab69d592600a02c.pdf]

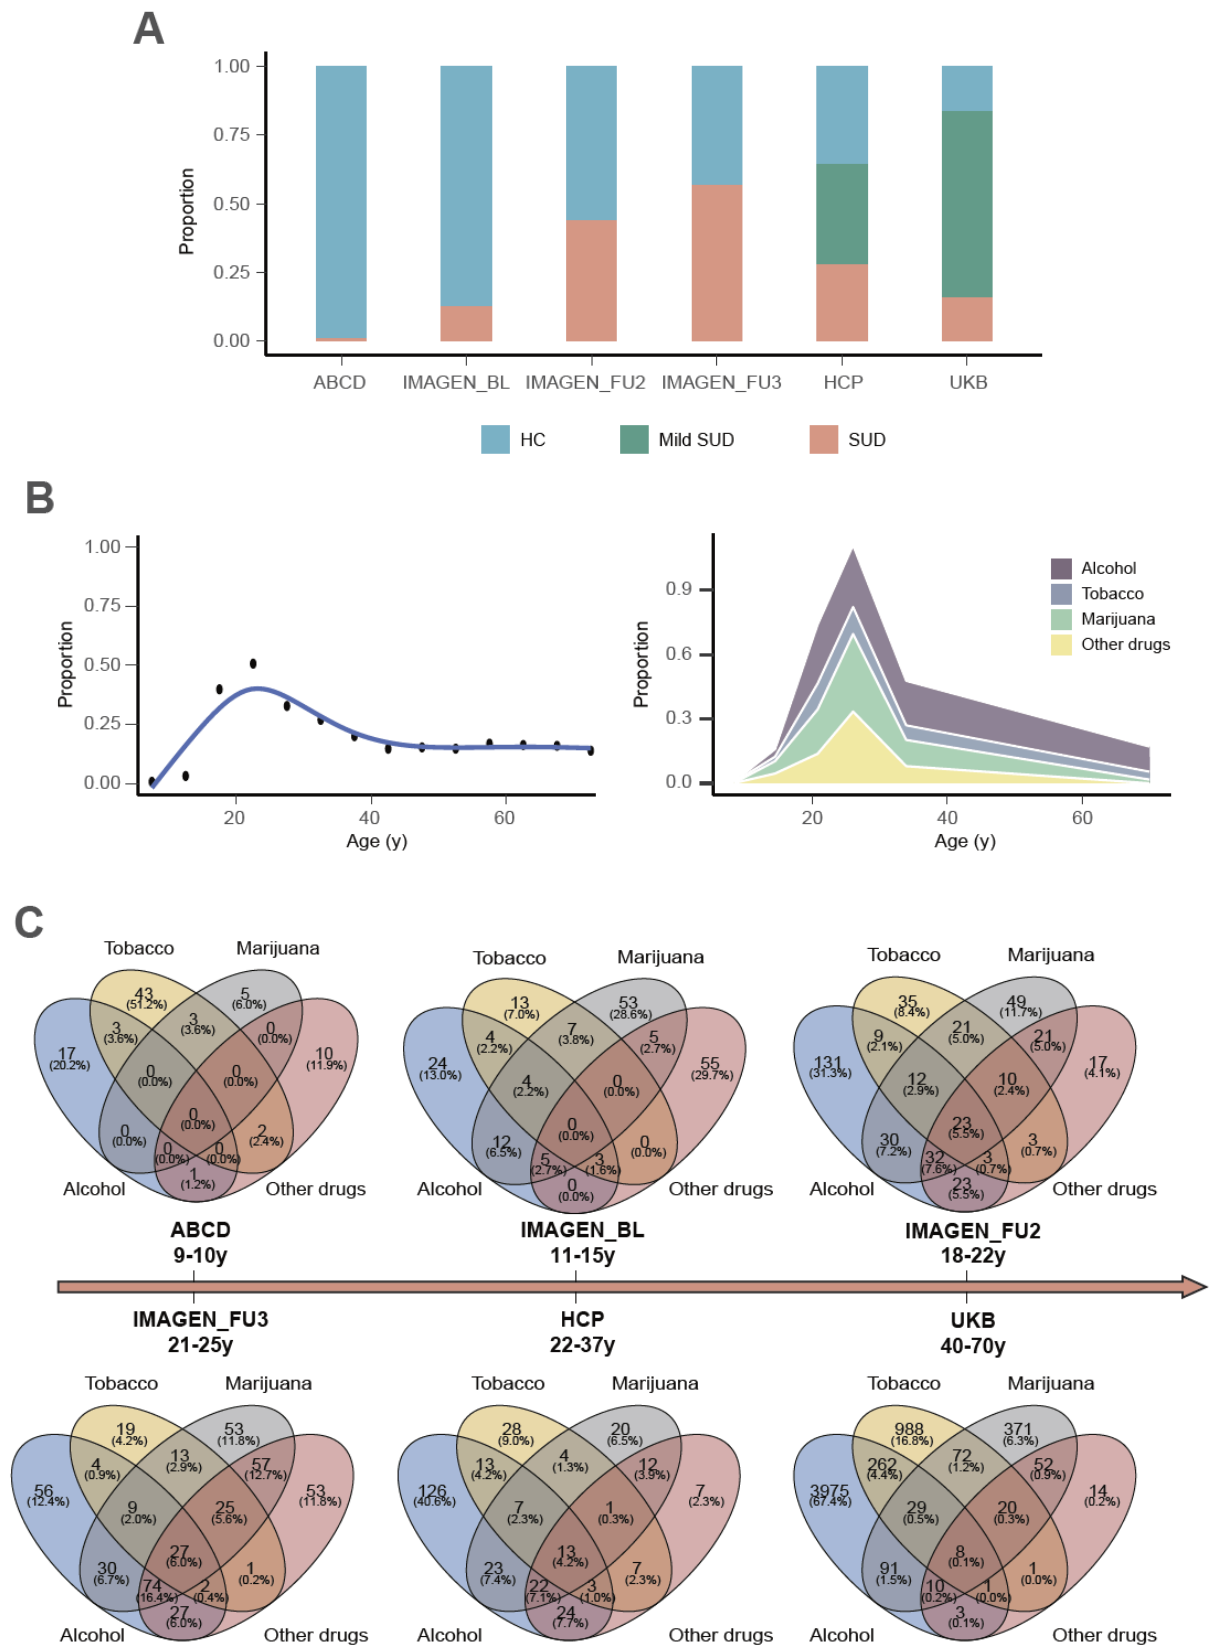

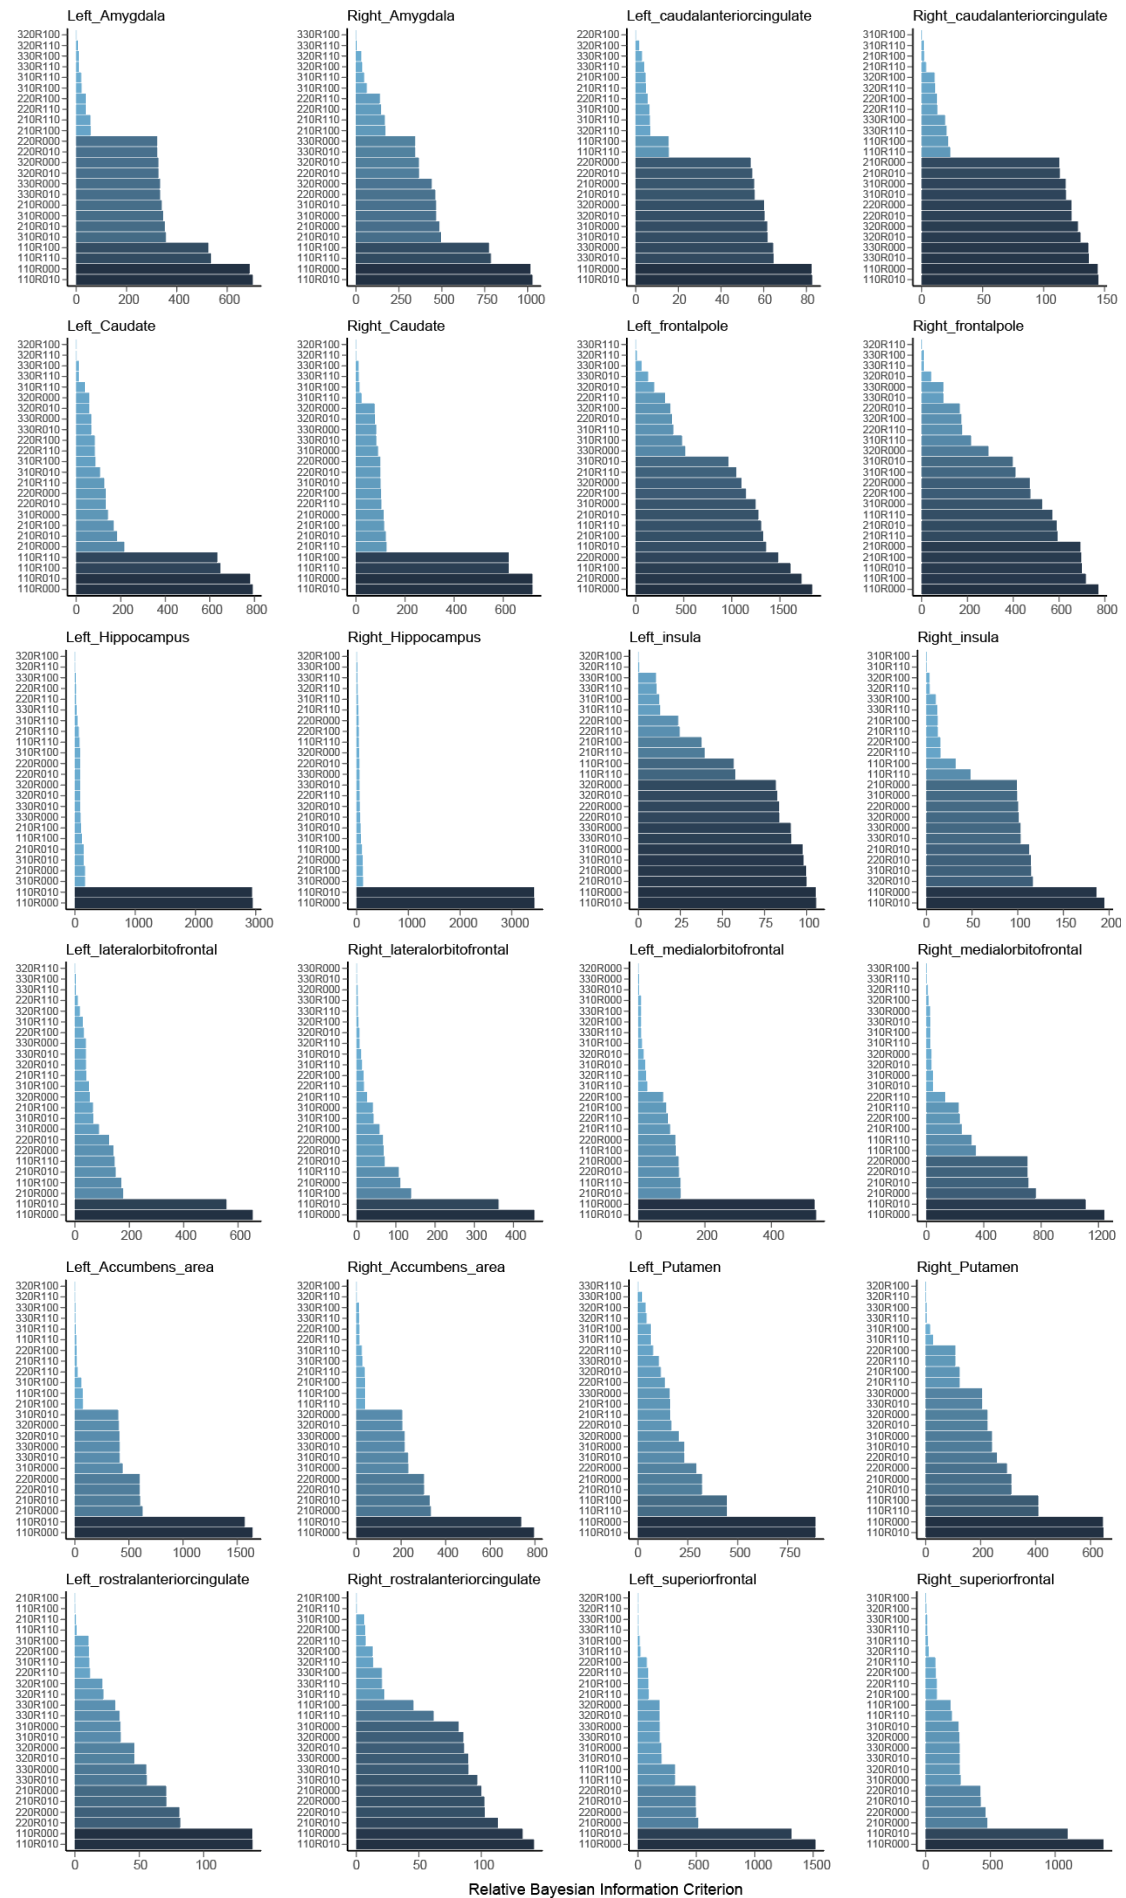

**Supplementary Fig. 2. Optimal GAMLSS model for different ROIs based on the Bayesian information criterion (BIC).** Relative BIC was provided relative to the lowest BIC of the best-fitting model. The y-axis

represents different model parameter settings, where the first three numbers and the last three numbers refer to the number of fractional polynomials and the inclusion of study random effect for the age term on  $\mu$ ,  $\sigma$ , and  $\nu$ , respectively.

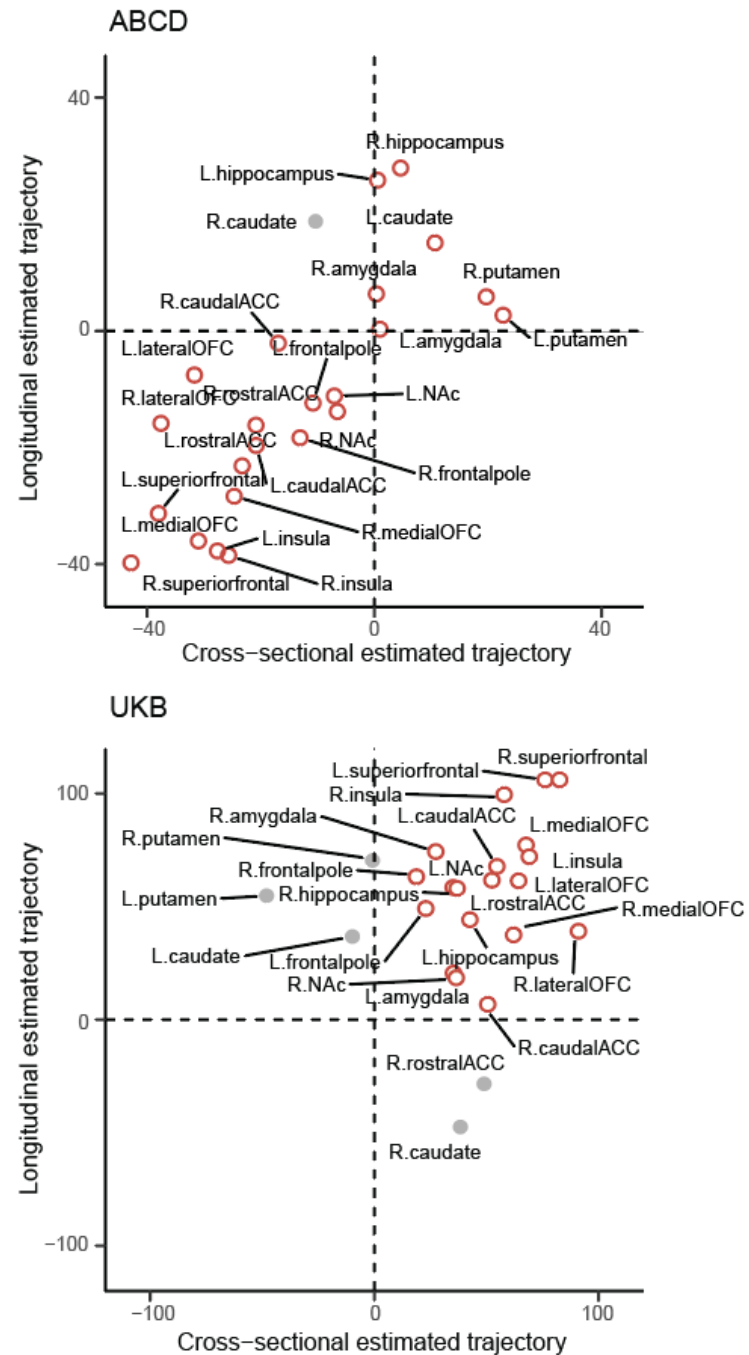

**Supplementary Fig. 3. Replication of lifespan volumetric patterns between SUDs and HCs using ABCD and UKB longitudinal data.**

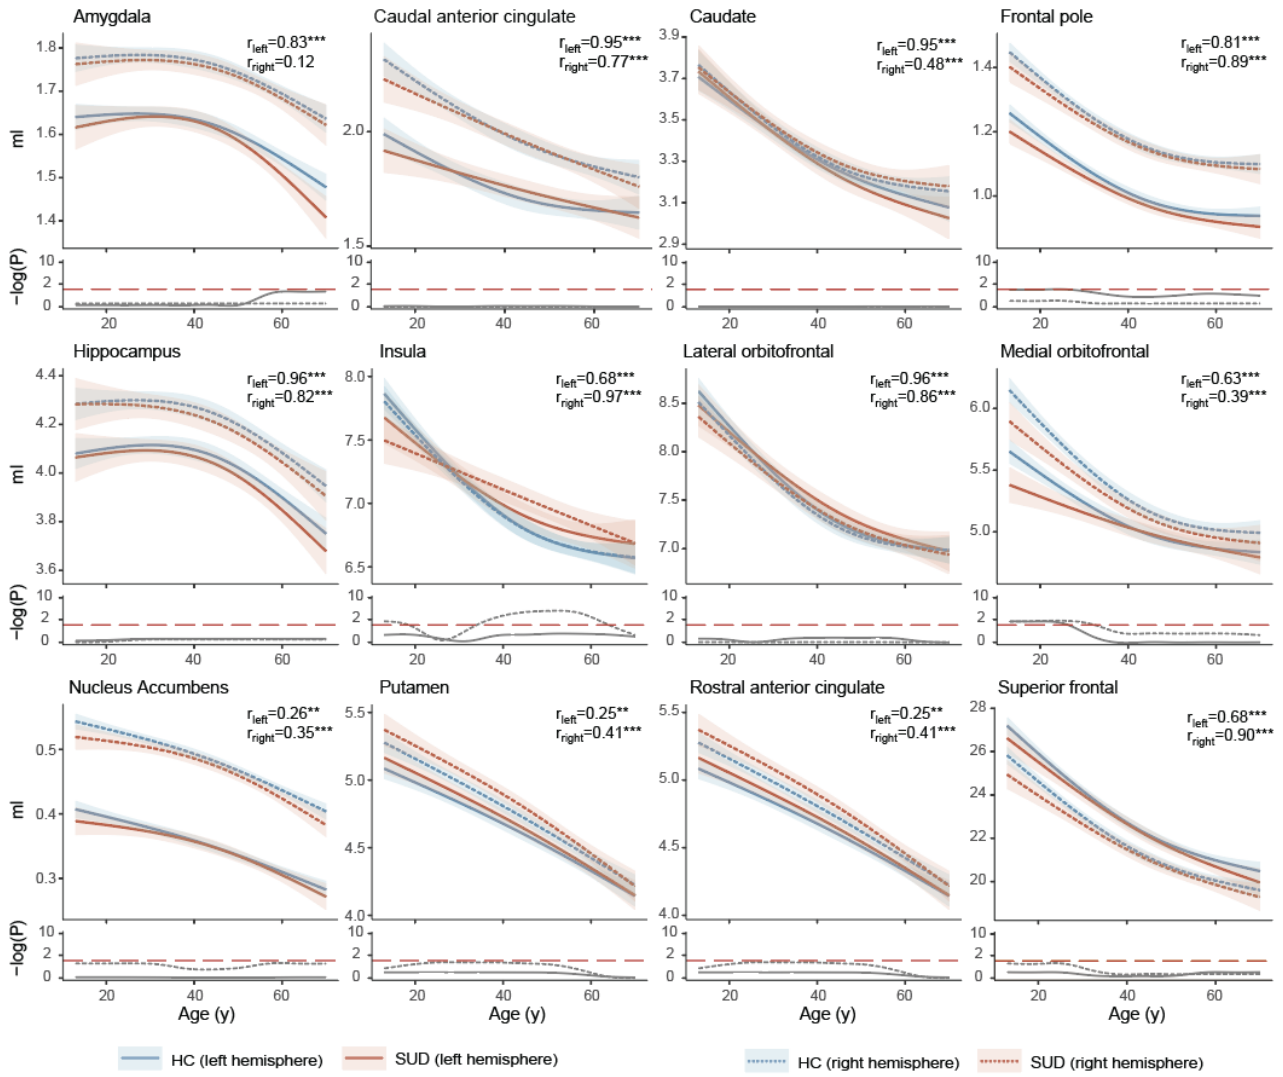

**Supplementary Fig. 4. Replication of lifespan volumetric patterns between SUDs and HCs using validation samples.** The comparison curves were only displayed for the age range of 13 - 70 years, due to the age limitations in the SUD group and also a clearer comparison with the exploratory results. Correlations of Z-values comparing SUD and HC between the discovery set and the validation set were provided. \*  $P < 0.05$ ; \*\*  $P < 0.01$ ; \*\*\*  $P < 0.001$ .

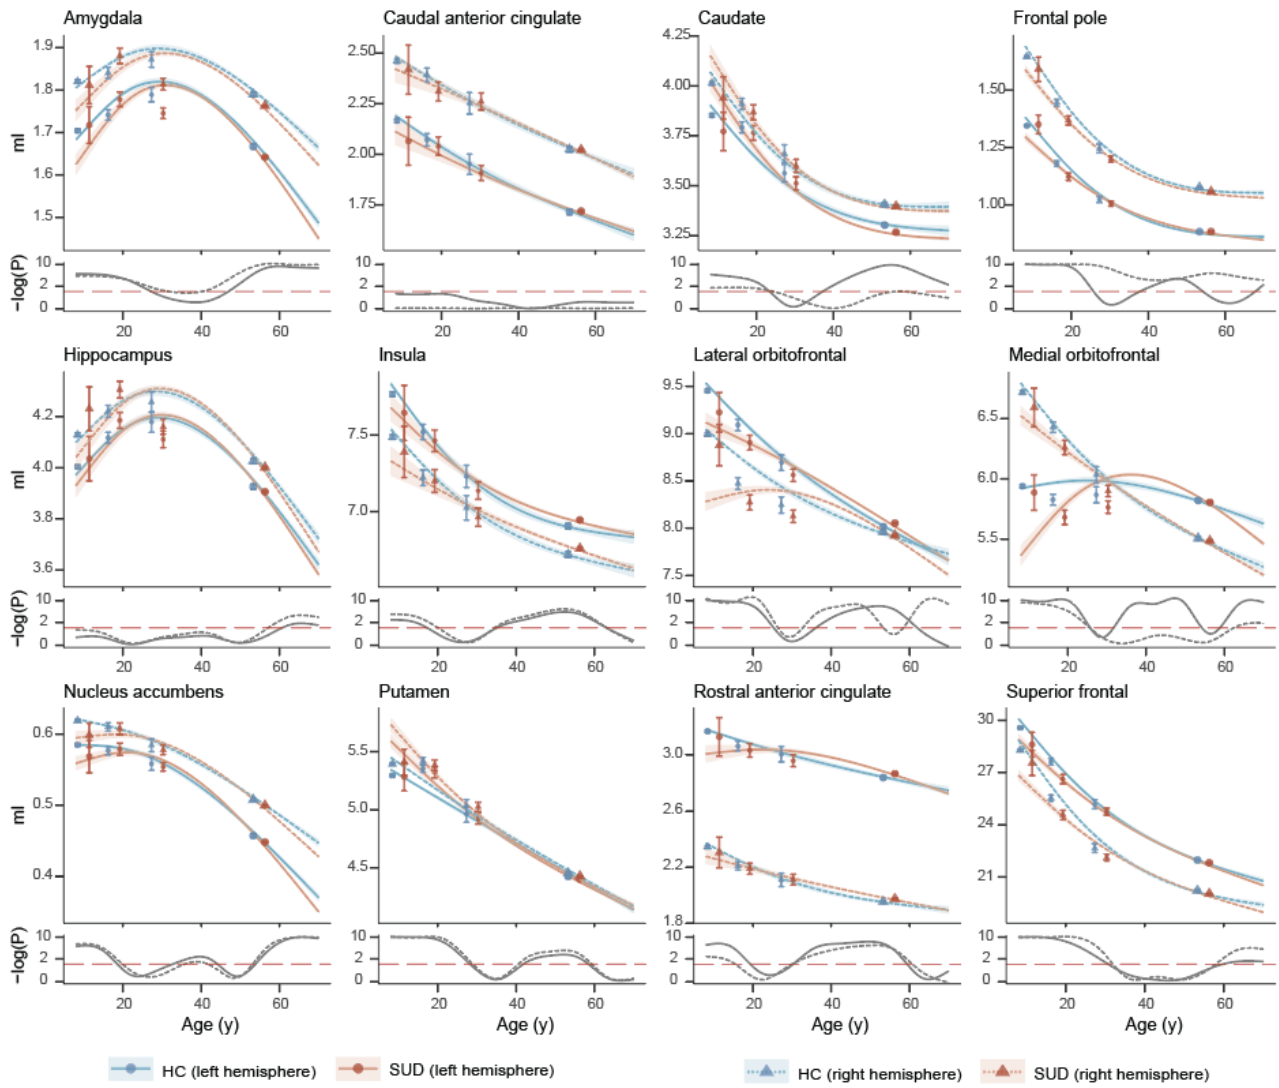

**Supplementary Fig. 5. Lifespan volumetric patterns between SUDs and HCs with a relaxed definition of SUD in adults to the standards used for adolescents.**

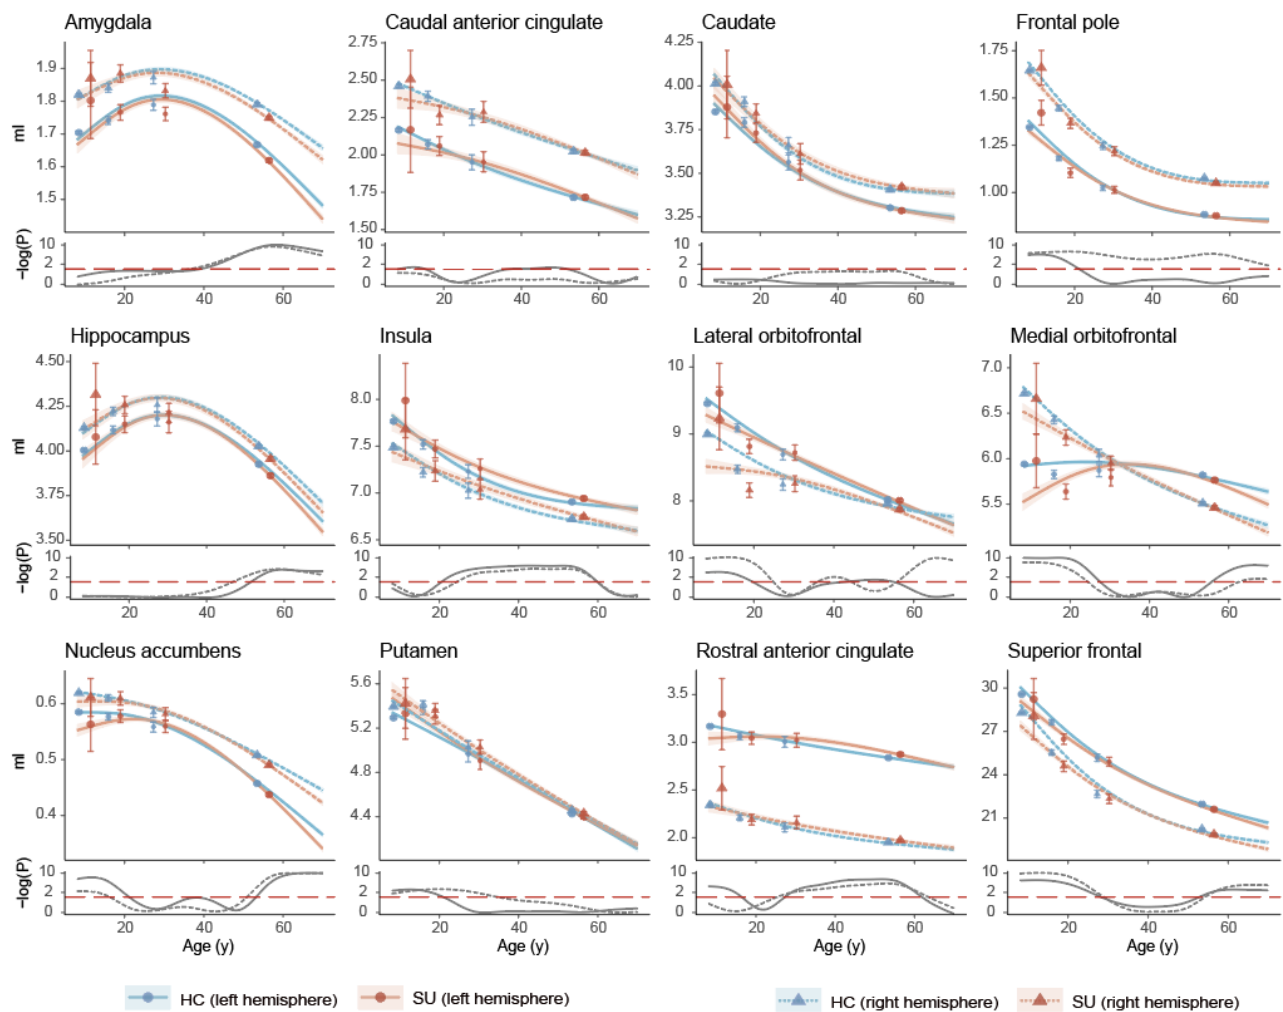

**Supplementary Fig. 6. Lifespan volumetric patterns between alcohol use disorder participants and HCs.**

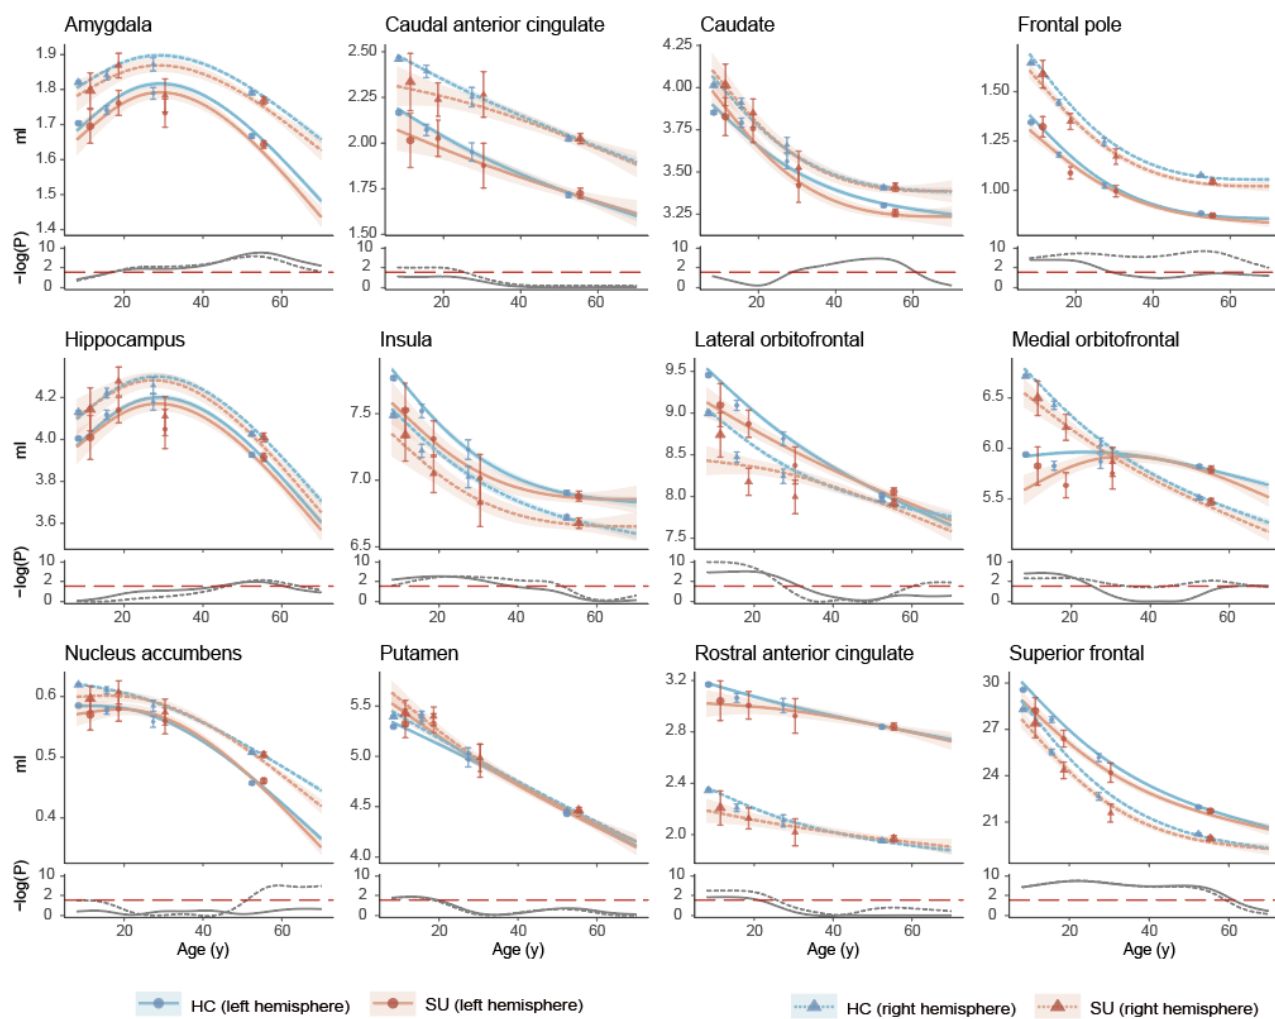

**Supplementary Fig. 7. Lifespan volumetric patterns between tobacco use disorder participants and HCs.**



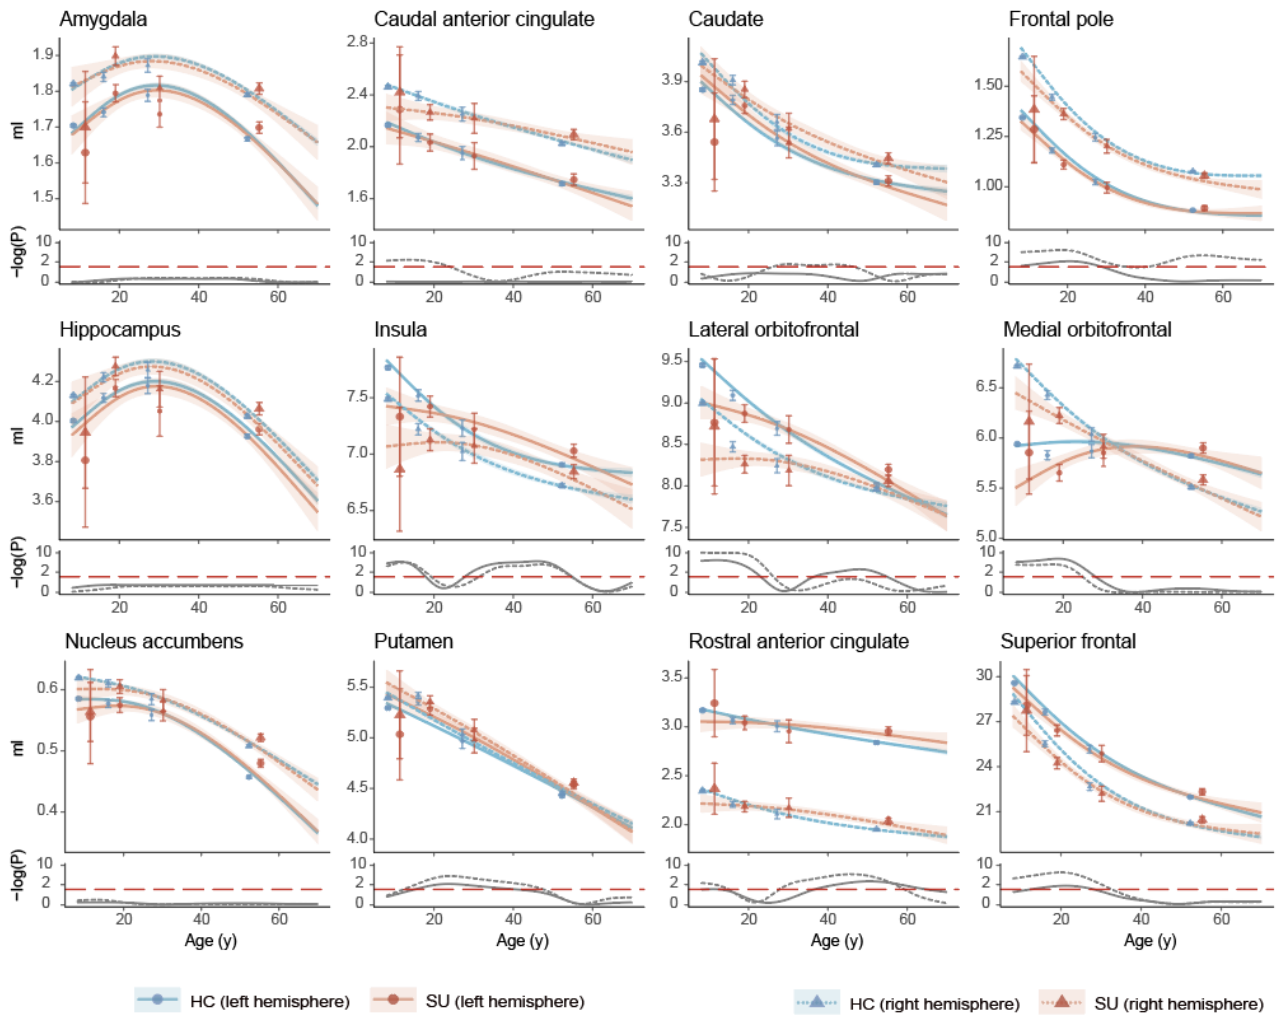

**Supplementary Fig. 8. Lifespan volumetric patterns between marijuana use disorder participants and HCs.**



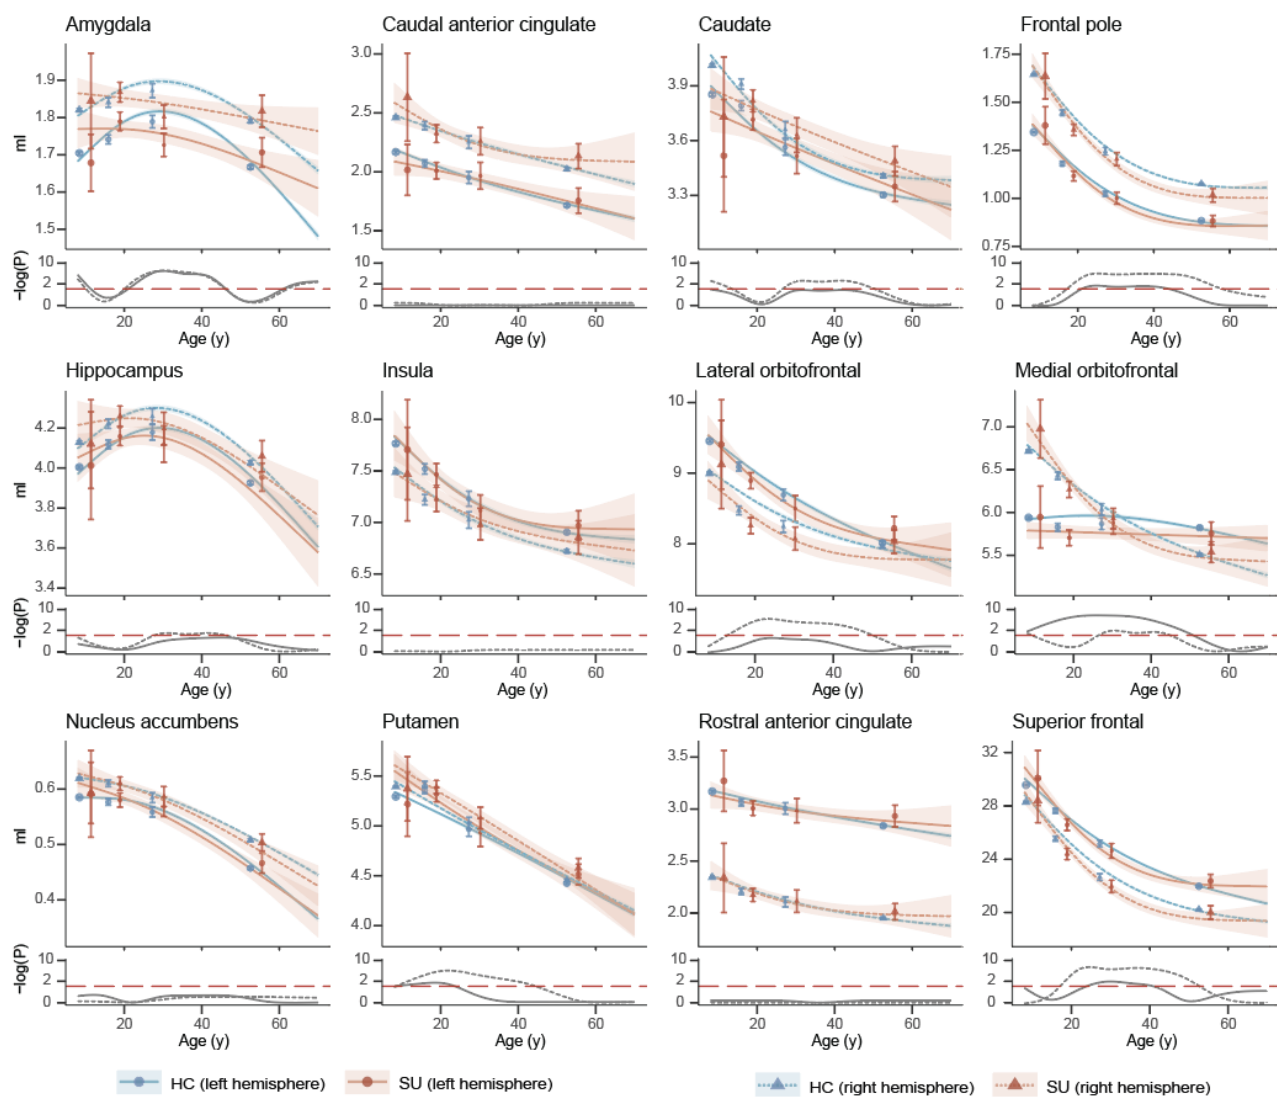

**Supplementary Fig. 9. Lifespan volumetric patterns between drug use disorder participants and HCs.**

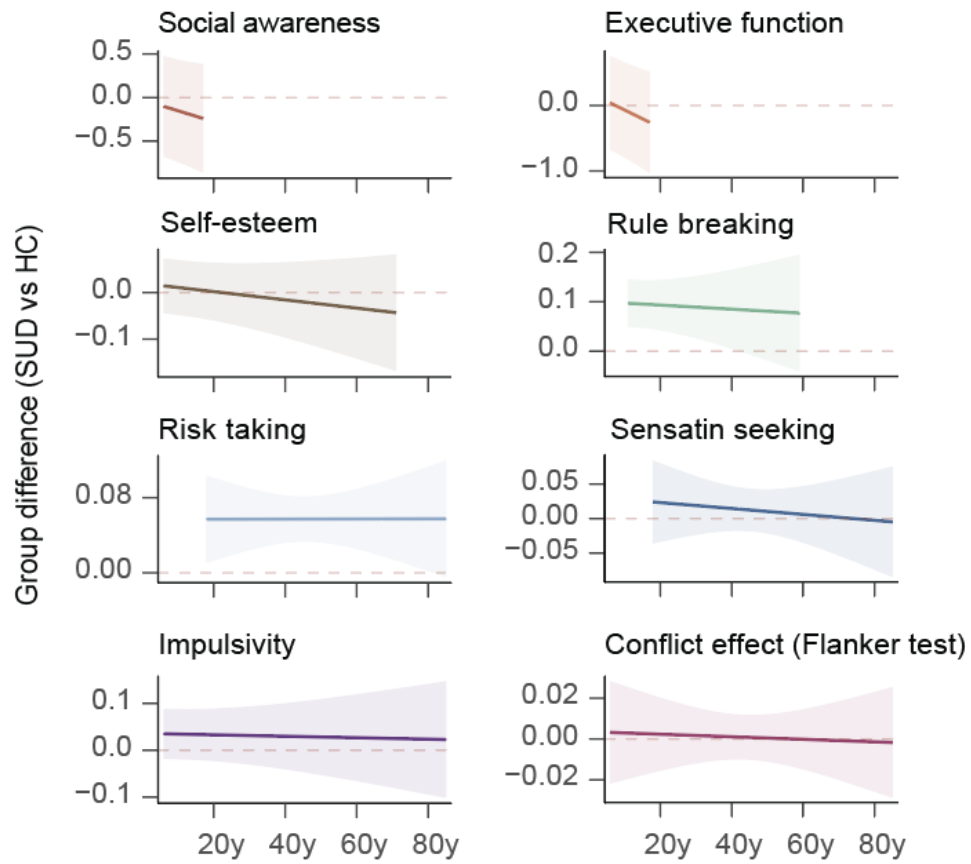

**Supplementary Fig. 10. Validation of behavioral and neurocognitive comparisons between SUDs and HCs in NKI-RS.**

[illegible]

## A word cloud of terms related to decision-making and risk-taking. The words are arranged in a dense, overlapping manner, with some words appearing larger and more prominent than others. The colors are primarily shades of blue, green, and yellow. The words include: monetary, reward, risk, choice, decision, prediction, error, value, probability, motivation, anticipation, impulsive, gambling, stress, expect, control, regulatory, cognitive, appraisal, expectations, predictive, choose, switch, decision making, preference, probabilistic, risk, motivational, subjective, high risk, rewarding, prediction, error, values, decision, impulsive, choices, self-report, preferences, probability, value, motivation, risk, taking, goals, cognitive, special condition, self-report, effect, and appraisal.

**Supplementary Fig. 11. Word cloud visualizing cognitive terms related to dimensionality-reduced cognitive factors. Word size indicates the absolute strength of the loading.**

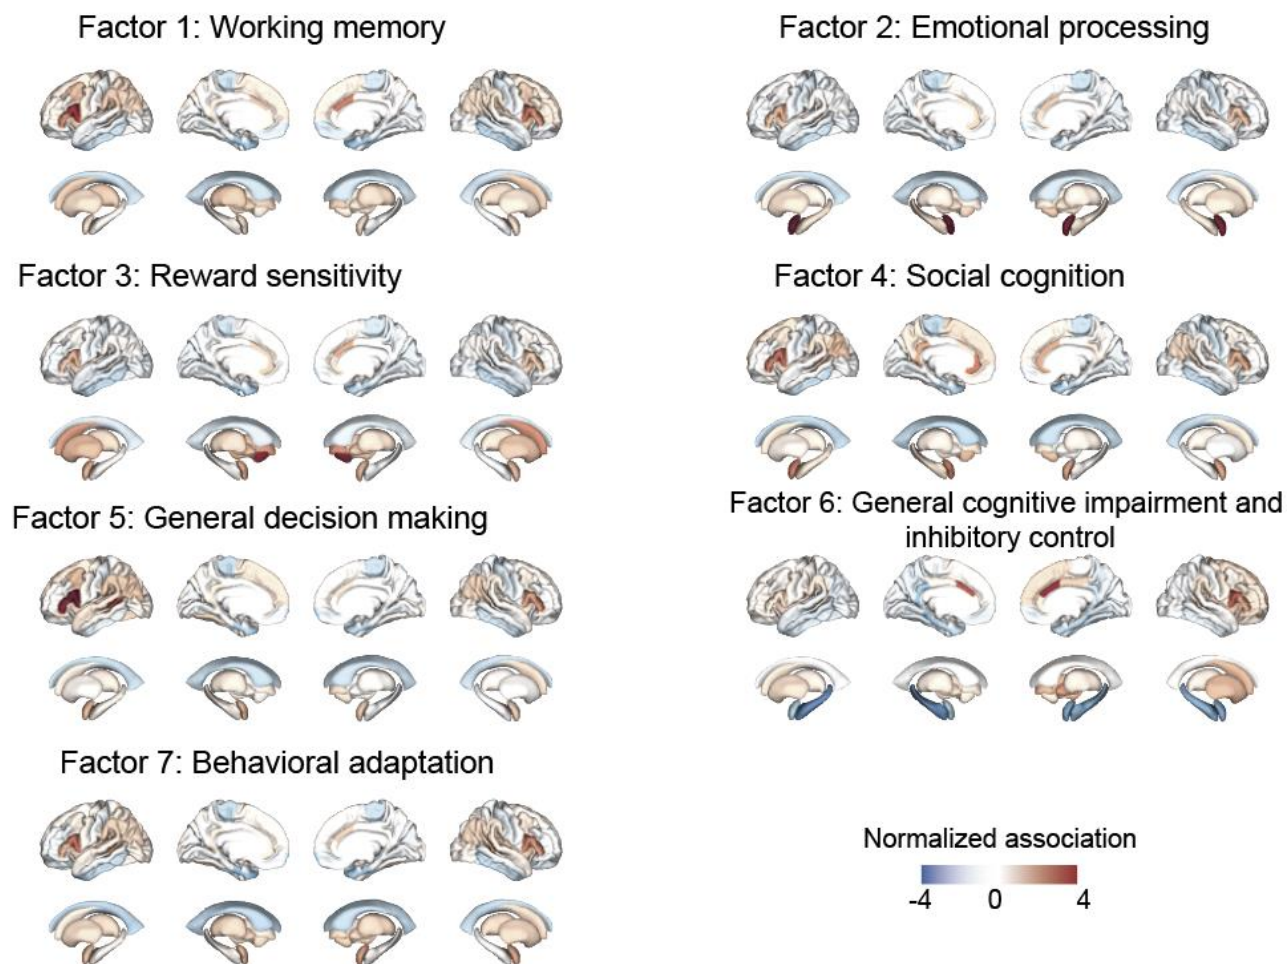

**Supplementary Fig. 12. Spatial distribution of cognitive factors on parcellated brain atlases. Colors represent normalized parcellated regional associations.**



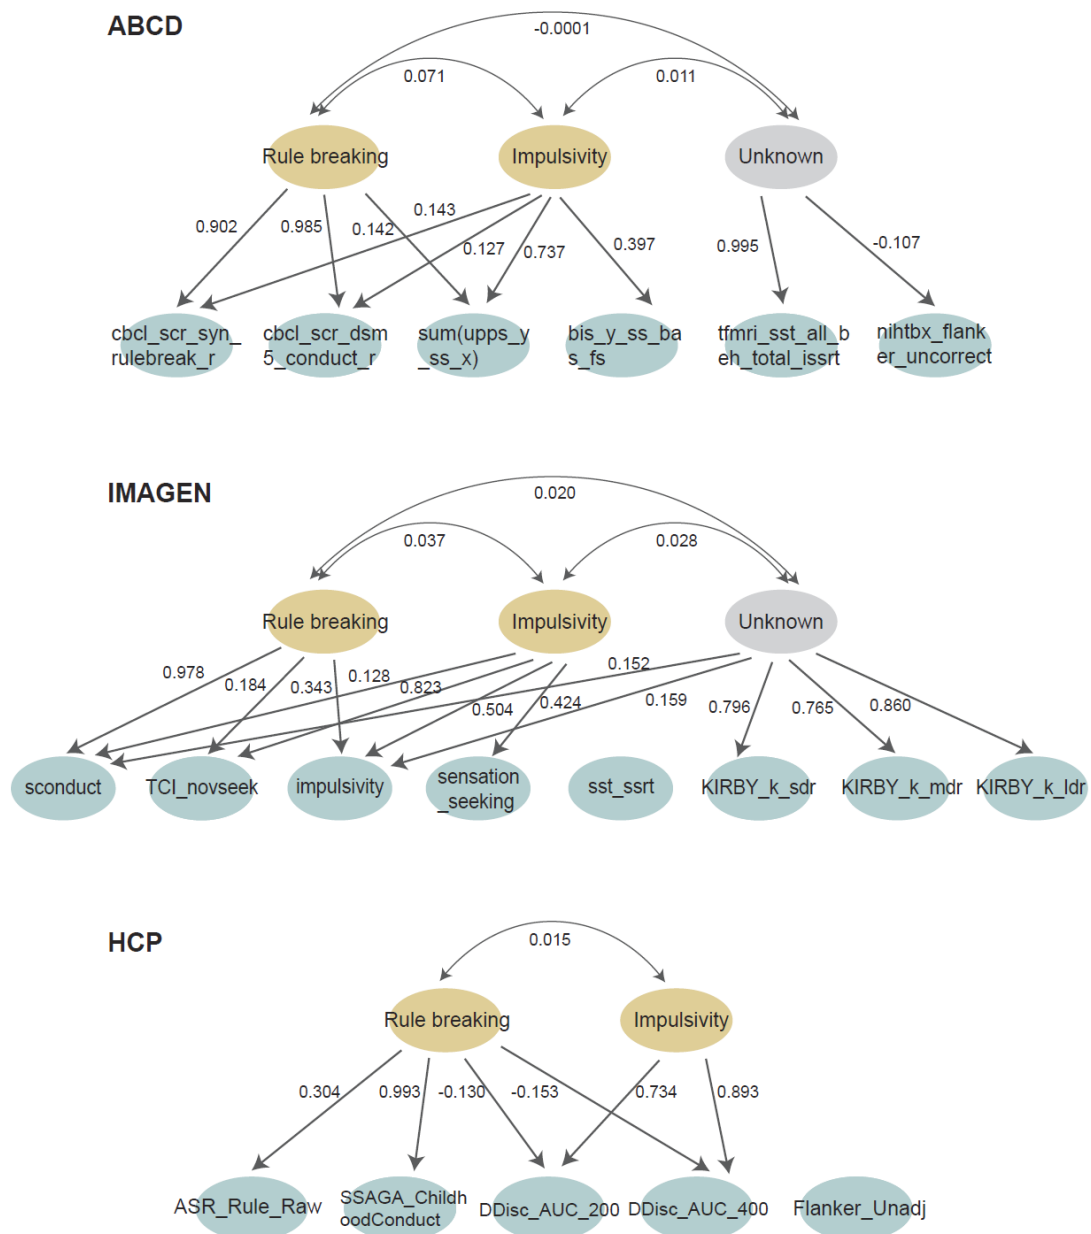

**Supplementary Fig. 13. Explorative factor analysis for generalized rule-breaking and impulsivity scores extraction across studies.** The number of factors were decided by the number of eigen values larger than 1. The absolute loadings lower than 0.1 were not shown.

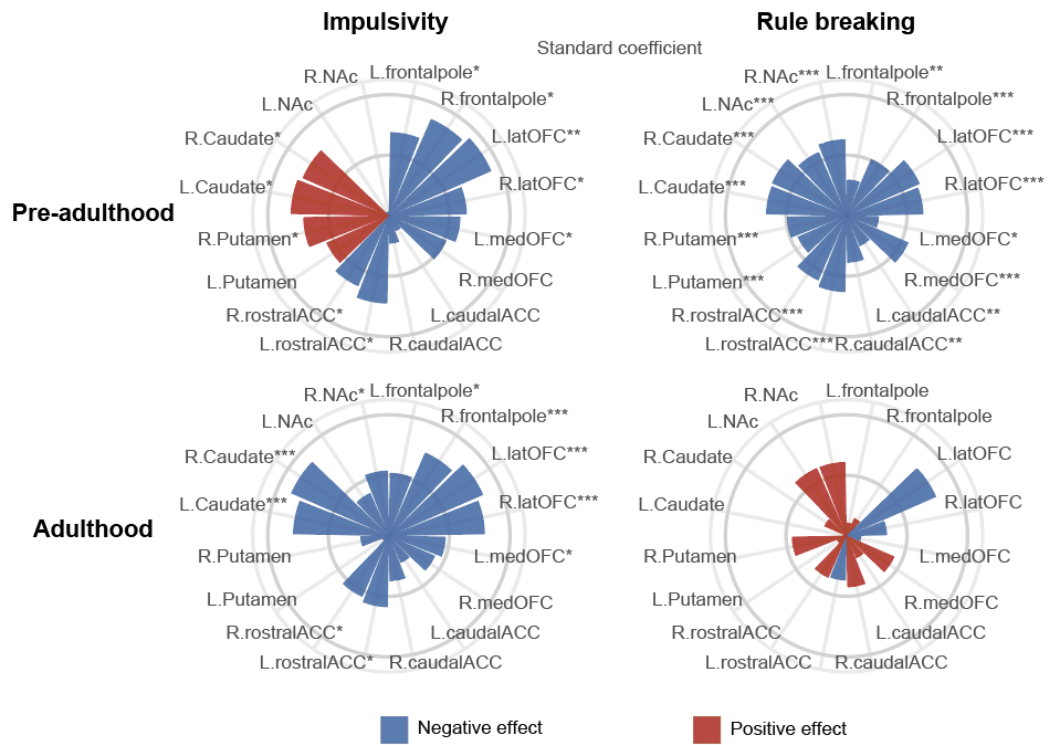

**Supplementary Fig. 14. Correlation patterns between rule-breaking/impulsivity scores and GMVs in ROIs after adjusting for the correlation between rule-breaking and impulsivity. BH-FDR method was used for multiple testing.**

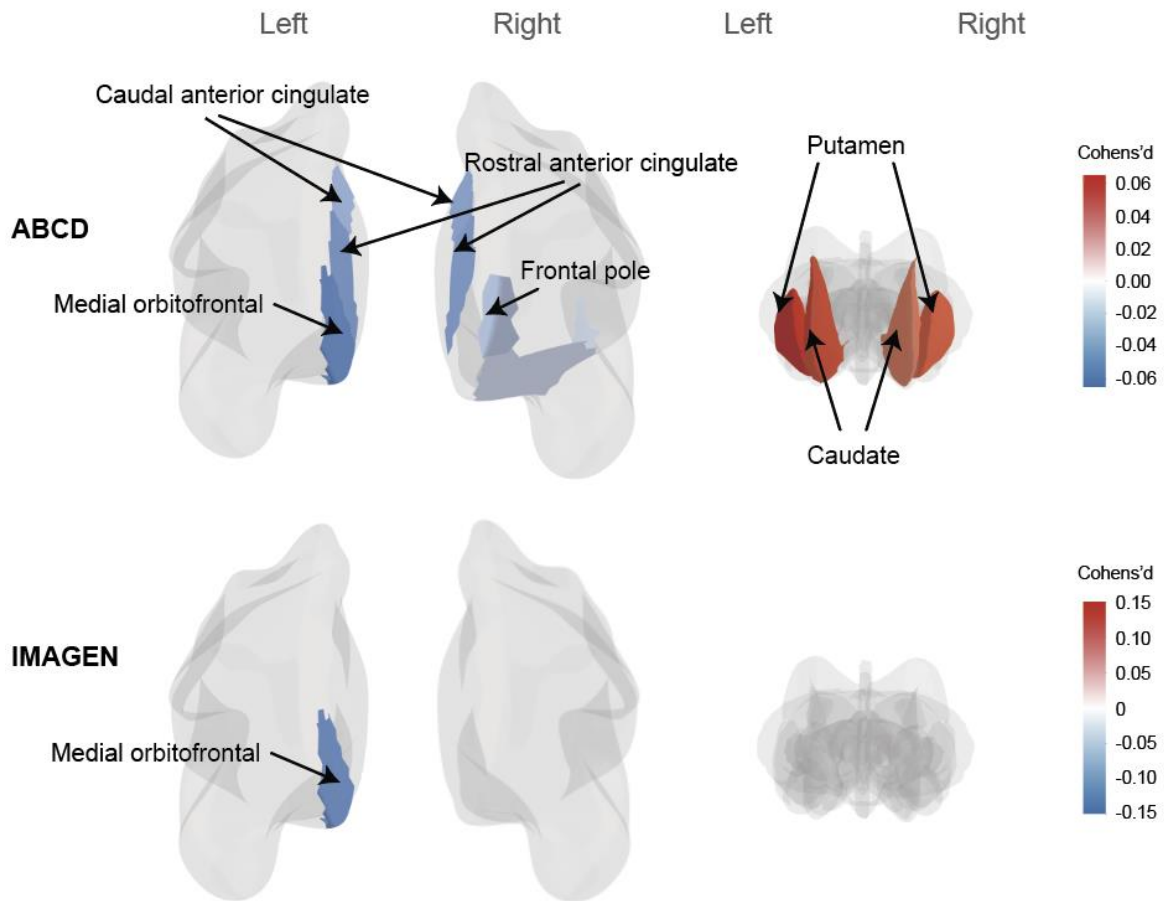

**Supplementary Fig. 15. Longitudinal investigation of GMV changes leading to SUD.** Two-tailed t-test was used and BH-FDR method was used for multiple testing.



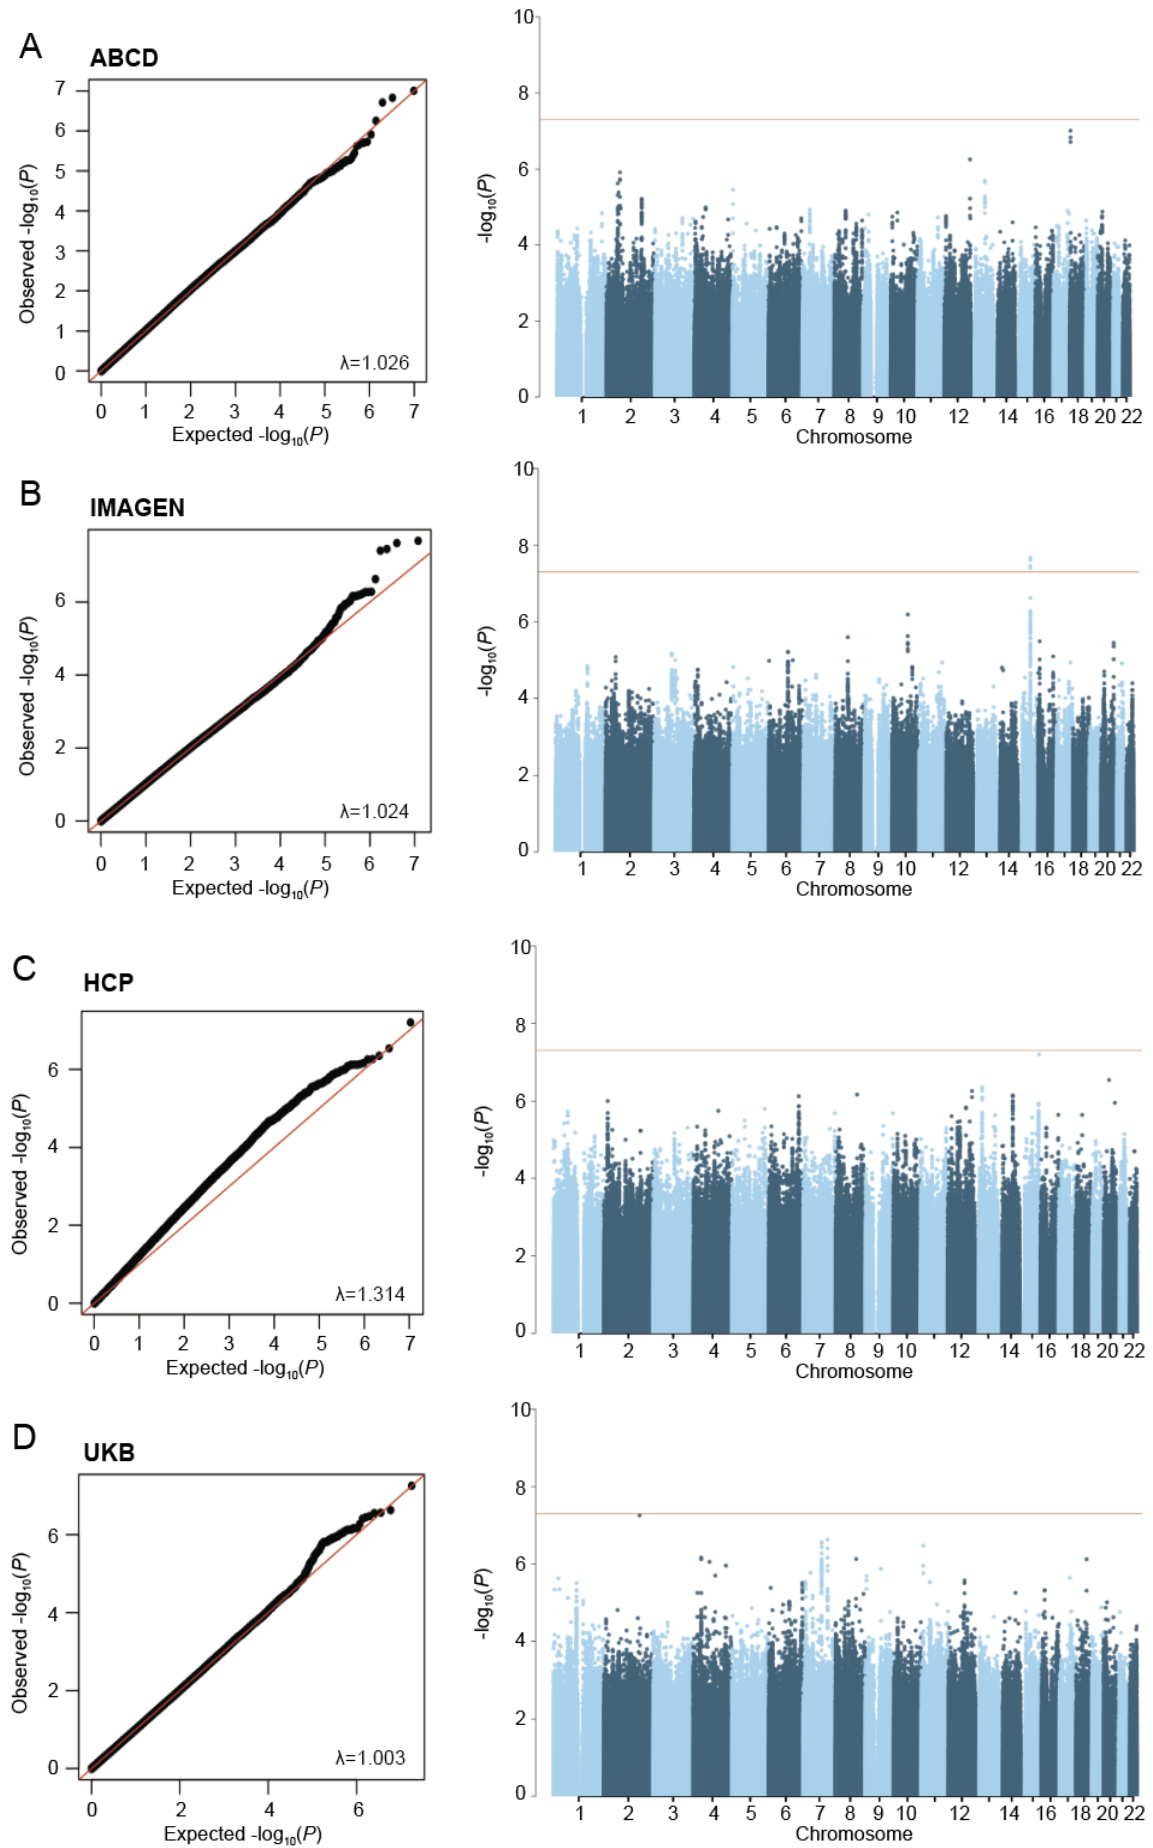

**Supplementary Fig. 16. GWAS results for SUD across studies.** SUD was used as a binary phenotype in GWAS for ABCD (A), IMAGEN (B), HCP (C) and UKB (D), respectively.

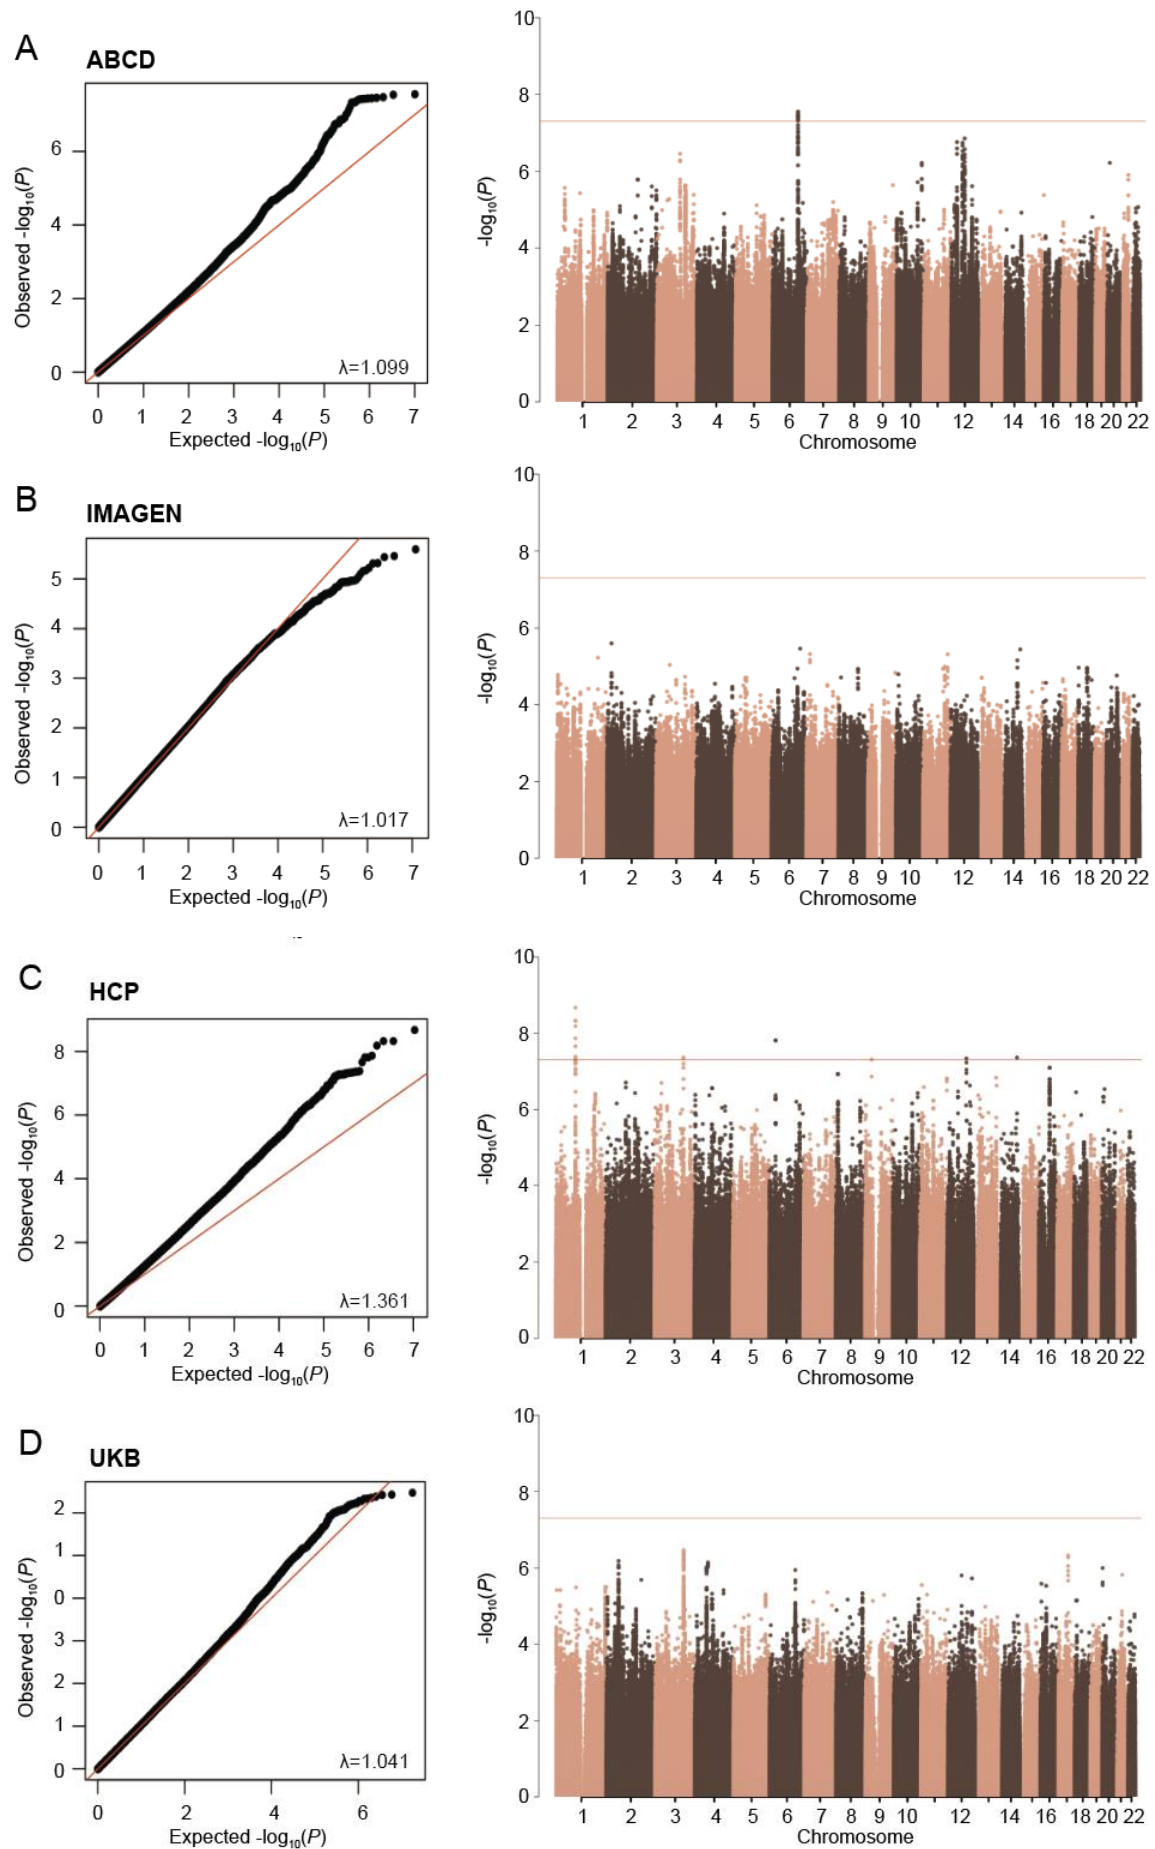

**Supplementary Fig. 17. GWAS results for wGMV across studies.** wGMV was used as a continuous phenotype in GWAS for ABCD (A), IMAGEN (B), HCP (C) and UKB (D), respectively.

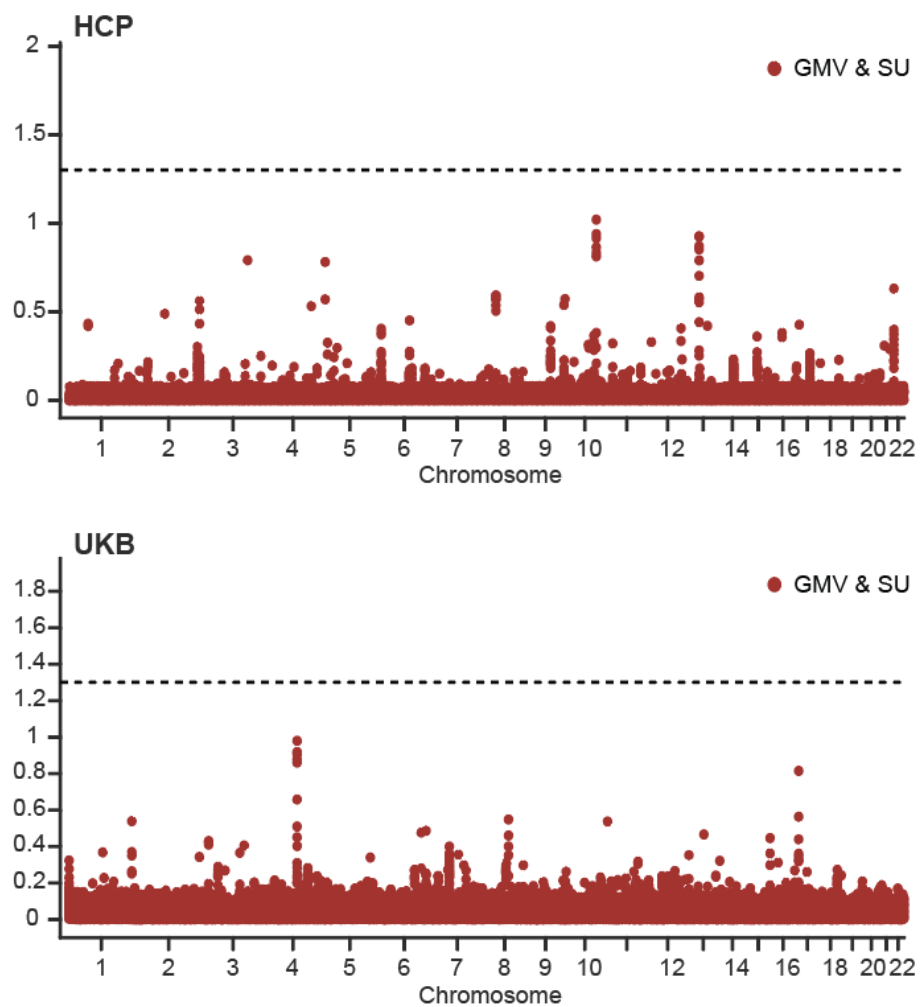

**Supplementary Fig. 18. conjFDR results in IMAGEN and UKB.**

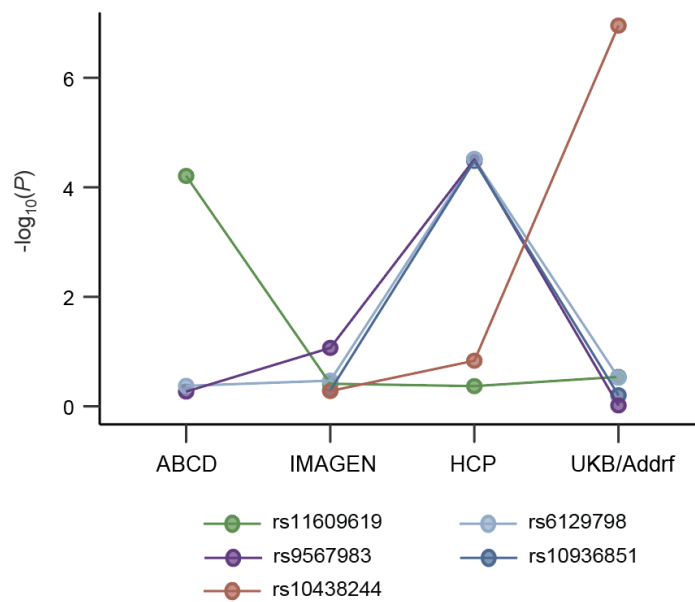

**Supplementary Fig. 19. Log  $P$ -values of significant loci identified in Fig. 4C across different life stages in the study cohorts.**

**Supplementary Table 1. Demographic characteristics of the samples in ABCD, IMAGEN, HCP and UKB.**

|            | ABCD ( <i>n</i> =11,301) |                 |          | IMAGEN ( <i>n</i> =1,504) |                 |          |                 |                 |          |                 |                 |          | HCP ( <i>n</i> =1,113) |                 |          | UKB ( <i>n</i> =37,549) |                  |          |
|------------|--------------------------|-----------------|----------|---------------------------|-----------------|----------|-----------------|-----------------|----------|-----------------|-----------------|----------|------------------------|-----------------|----------|-------------------------|------------------|----------|
|            |                          |                 |          | BL                        |                 |          | FU2             |                 |          | FU3             |                 |          |                        |                 |          |                         |                  |          |
|            | HC                       | SU              | <i>P</i> | HC                        | SU              | <i>P</i> | HC              | SU              | <i>P</i> | HC              | SU              | <i>P</i> | HC                     | SU              | <i>P</i> | HC                      | SU               | <i>P</i> |
| <i>n</i>   | 11,217                   | 84              |          | 1,298                     | 185             |          | 539             | 419             |          | 345             | 450             |          | 396                    | 310             |          | 6,243                   | 5,897            |          |
| Age        | 9.92<br>(0.62)           | 10.04<br>(0.67) | 0.101    | 14.39<br>(0.41)           | 14.48<br>(0.37) | 0.003    | 18.95<br>(0.74) | 19.09<br>(0.72) | 0.002    | 22.93<br>(0.74) | 22.93<br>(0.65) | 0.937    | 28.76<br>(3.70)        | 28.69<br>(3.42) | 0.800    | 54.14<br>(7.75)         | 55.05<br>(7.44)  | <0.001   |
| Gender     |                          |                 | 0.003    |                           |                 | 0.023    |                 |                 | <0.001   |                 |                 | <0.001   |                        |                 | <0.001   |                         |                  | <0.001   |
| Male       | 5,843<br>(52.1%)         | 58<br>(69.0%)   |          | 680<br>(52.4%)            | 114<br>(61.6%)  |          | 240<br>(44.5%)  | 273<br>(65.2%)  |          | 137<br>(39.7%)  | 281<br>(62.4%)  |          | 151<br>(38.1%)         | 195<br>(62.9%)  |          | 2,023<br>(32.4%)        | 3,802<br>(64.5%) |          |
| Female     | 5,374<br>(47.9%)         | 26<br>(31.0%)   |          | 618<br>(47.6%)            | 71<br>(38.4%)   |          | 299<br>(55.5%)  | 146<br>(34.8%)  |          | 208<br>(60.3%)  | 169<br>(37.6%)  |          | 245<br>(61.9%)         | 115<br>(37.1%)  |          | 4,220<br>(67.6%)        | 2,095<br>(35.5%) |          |
| Handedness |                          |                 | 0.579    |                           |                 | 1.00     |                 |                 | 0.700    |                 |                 | 0.473    |                        |                 | 0.702    |                         |                  | 0.221    |
| Right      | 8,920<br>(79.5%)         | 63<br>(75.0%)   |          | 1,156<br>(89.1%)          | 165<br>(89.2%)  |          | 481<br>(89.2%)  | 378<br>(90.2%)  |          | 305<br>(88.4%)  | 405<br>(90.0%)  |          | 358<br>(90.4%)         | 281<br>(90.6%)  |          | 5,601<br>(89.7%)        | 5,245<br>(88.9%) |          |
| Left       | 813<br>(7.2%)            | 7<br>(8.3%)     |          | 142<br>(10.9%)            | 20<br>(10.8%)   |          | 58<br>(10.8%)   | 41<br>(9.8%)    |          | 40<br>(11.6%)   | 45<br>(10.0%)   |          | 37<br>(9.3%)           | 27<br>(8.7%)    |          | 541<br>(8.7%)           | 563<br>(9.5%)    |          |
| Mixed      | 1,484<br>(13.2%)         | 14<br>(16.7%)   |          | -                         | -               |          | -               | -               |          | -               | -               |          | 1<br>(0.3%)            | 2<br>(0.6%)     |          | 101<br>(1.6%)           | 89<br>(1.5%)     |          |
| Ethnics    |                          |                 | 0.139    |                           |                 | 0.595    |                 |                 | 0.648    |                 |                 | 0.162    |                        |                 | 0.069    |                         |                  | <0.001   |
| White      | 7,083<br>(67.2%)         | 46<br>(56.8%)   |          | 1,122<br>(91.7%)          | 153<br>(89.5%)  |          | 453<br>(91.3%)  | 350<br>(92.6%)  |          | 237<br>(88.1%)  | 325<br>(92.1%)  |          | 298<br>(76.0%)         | 251<br>(82.6%)  |          | 5,731<br>(92.0%)        | 5,747<br>(97.8%) |          |
| Black      | 1,764<br>(16.7%)         | 18<br>(22.2%)   |          | 13<br>(1.1%)              | 2<br>(1.2%)     |          | 4<br>(0.8%)     | 4<br>(1.1%)     |          | 3<br>(1.1%)     | 5<br>(1.4%)     |          | 56<br>(14.3%)          | 36<br>(11.8%)   |          | 99<br>(1.6%)            | 32<br>(0.5%)     |          |
| Other      | 1,694<br>(16.1%)         | 17<br>(21.0%)   |          | 88<br>(7.2%)              | 16<br>(9.4%)    |          | 39<br>(7.9%)    | 24<br>(6.3%)    |          | 29<br>(10.8%)   | 23<br>(6.5%)    |          | 38<br>(9.7%)           | 17<br>(5.6%)    |          | 396<br>(6.4%)           | 96<br>(1.6%)     |          |
| BMI        | 18.84<br>(4.19)          | 20.03<br>(4.96) | 0.011    | 20.61<br>(3.21)           | 21.15<br>(3.24) | 0.024    | 22.35<br>(3.84) | 23.07<br>(3.96) | 0.025    | 23.33<br>(4.50) | 23.45<br>(3.74) | 0.783    | 26.44<br>(5.38)        | 26.57<br>(4.57) | 0.933    | 25.93<br>(4.65)         | 25.73<br>(3.81)  | 0.005    |
| SES        | 7.22<br>(2.42)           | 6.09<br>(2.47)  | <0.001   | 0.64<br>(1.00)            | 0.80<br>(0.98)  | 0.046    | 0.54<br>(0.87)  | 0.62<br>(0.90)  | 0.136    | 0.52<br>(0.83)  | 0.60<br>(0.87)  | 0.288    | 5.31<br>(2.09)         | 4.88<br>(2.20)  | 0.002    | 2.73<br>(1.12)          | 3.09<br>(1.15)   | <0.001   |
| NLE        | 2.45<br>(2.29)           | 3.48<br>(2.75)  | <0.001   | 4.97<br>(2.44)            | 5.30<br>(2.76)  | 0.096    | 2.52<br>(1.76)  | 2.74<br>(1.94)  | 0.009    | 1.22<br>(1.05)  | 1.34<br>(1.26)  | 0.095    | 47.76<br>(8.64)        | 49.37<br>(9.61) | 0.010    | 2.06<br>(2.74)          | 2.46<br>(2.94)   | <0.001   |

|                     |                 |                  |        |                   |                   |       |   |                |  |   |                |  |                 |                 |       |                 |                  |       |
|---------------------|-----------------|------------------|--------|-------------------|-------------------|-------|---|----------------|--|---|----------------|--|-----------------|-----------------|-------|-----------------|------------------|-------|
| IQ                  | 86.29<br>(9.08) | 83.18<br>(11.06) | <0.001 | 176.04<br>(22.31) | 172.20<br>(24.91) | 0.015 | - | -              |  | - | -              |  | 17.15<br>(4.83) | 17.05<br>(4.67) | 0.240 | 10.22<br>(2.05) | 9.70<br>(2.07)   | 0.031 |
| Substance<br>misuse |                 |                  |        |                   |                   |       |   |                |  |   |                |  |                 |                 |       |                 |                  |       |
| Alcohol             | -               | 21<br>(25.0%)    |        | -                 | 52<br>(28.1%)     |       | - | 263<br>(62.8%) |  | - | 229<br>(50.9%) |  | -               | 231<br>(74.5%)  |       | -               | 4,379<br>(74.3%) |       |
| Tobacco             | -               | 51<br>(60.7%)    |        | -                 | 31<br>(16.8%)     |       | - | 116<br>(27.7%) |  | - | 100<br>(22.2%) |  | -               | 76<br>(24.5%)   |       | -               | 1,381<br>(23.4%) |       |
| Marijuana           | -               | 8<br>(9.5%)      |        | -                 | 86<br>(46.5%)     |       | - | 198<br>(47.3%) |  | - | 288<br>(64.0%) |  | -               | 102<br>(32.9%)  |       | -               | 653<br>(11.1%)   |       |
| Other<br>Drugs      | -               | 13<br>(15.5%)    |        | -                 | 68<br>(36.8%)     |       | - | 132<br>(31.5%) |  | - | 266<br>(59.1%) |  | -               | 89<br>(28.7%)   |       | -               | 109<br>(0.02%)   |       |

Continuous variables were provided as mean(s.d.) and discrete variables were provided as n(%).

**Supplementary Table 2. Comparisons in neurobehavioral performances between SUDs and HCs in ABCD.**

| Measurements                                             | Cohen's d | $P_{adj}$ |
|----------------------------------------------------------|-----------|-----------|
| CBCL - rule breaking                                     | 0.64      | 1.02E-08  |
| CBCL - conduct score                                     | 0.73      | 1.12E-10  |
| CBCL - stress score                                      | 0.34      | 0.004     |
| BIS/BAS - fun seeking score                              | 0.27      | 0.023     |
| UPPS-P total impulsivity score                           | 0.44      | 1.35E-04  |
| Picture vocabulary test score                            | -0.22     | 0.046     |
| Flanker test score                                       | -0.15     | 0.161     |
| List sorting test score                                  | -0.20     | 0.071     |
| Card sort test score                                     | -0.20     | 0.072     |
| Pattern comparison test score                            | 0.07      | 0.582     |
| Picture sequence memory test score                       | -0.24     | 0.033     |
| Reading recognition test score                           | -0.31     | 0.008     |
| Fluid intelligence                                       | -0.26     | 0.028     |
| Crystal intelligence                                     | -0.40     | 0.001     |
| Overall intelligence                                     | -0.25     | 0.032     |
| SST - stop signal reaction time (integration estimation) | 0.01      | 0.927     |
| MID - Positive rate in small reward trails               | 0.13      | 0.602     |
| MID - Positive rate in large reward trails               | -0.44     | 0.046     |

Two-sided t-test was used for comparison, adjusting for age, sex and handedness. BH-FDR was used for multiple testing. CBCL, Child Behavior Check List; BIS/BAS, Behavioral inhibition and Behavioral Activations scales; SST, Stop Signal Test; MID, Monetary Incentive Delay task. All the rate calculation in reward trails was adjusted for the corresponding rate in neural trails.



**Supplementary Table 3. Comparisons in neurobehavioral performances between SUDs and HCs in IMAGEN.**

| Measurements                               | Cohen's d | $P_{adj}$ |
|--------------------------------------------|-----------|-----------|
| Conduct problem                            | 0.25      | 5.88E-06  |
| TCI - disorderliness vs. regimentation     | 0.33      | 1.23E-09  |
| TCI - novelty seeking total score          | 0.48      | 3.49E-18  |
| CGT - delay aversion                       | 0.11      | 0.154     |
| CGT - deliberation time                    | -0.01     | 0.910     |
| CGT - overall proportion bet               | 0.09      | 0.205     |
| CGT - quality of decision making           | -0.03     | 0.725     |
| CGT - risk adjustment                      | -0.01     | 0.910     |
| CGT - risk taking                          | 0.08      | 0.223     |
| SST - stop signal reaction time            | -0.06     | 0.363     |
| SWM - between errors                       | -0.07     | 0.363     |
| SWM - strategy                             | -0.01     | 0.910     |
| AGN - mean correct latency positive        | 0.03      | 0.781     |
| AGN - mean correct latency negative        | 0.01      | 0.910     |
| AGN - total omissions positive             | -0.07     | 0.454     |
| AGN - total omissions negative             | -0.06     | 0.495     |
| SURPS - sensation seeking                  | 0.41      | 4.40E-14  |
| SURPS - impulsivity                        | 0.36      | 7.25E-11  |
| MID - Positive rate in small reward trails | 0.03      | 0.725     |
| MID - Positive rate in large reward trails | 0.06      | 0.363     |
| PRM - Percent correct                      | -0.18     | 0.034     |
| RVP - A                                    | -0.15     | 0.053     |
| KIRBY - k                                  | 0.09      | 0.191     |
| KIRBY - k for small LDRs                   | 0.13      | 0.045     |
| KIRBY - k for Medium LDRs                  | 0.13      | 0.039     |
| KIRBY - k for Large LDRs                   | 0.10      | 0.154     |

Two-sided t-test was used for comparison, adjusting for age, sex and handedness. BH-FDR was used for multiple testing. TCI, Temperament and Character Inventory; CGT, Cambridge Guessing Task; SST, Stop Signal Test; SWM, Spatial Working Memory; AGN, Affective Go-No Go; SURPS, Substance Use Risk Profile Scale; MID, Monetary

Incentive Delay task; PRM, Pattern Recognition Memory; RVP, Rapid visual Information Processing; KIRBY, Monetary-Choice Questionnaire. All the rate calculation in reward trails was adjusted for the corresponding rate in neural trails.

**Supplementary Table 4. Comparisons in neurobehavioral performances between SUDs and HCs in HCP.**

| Measurements                                   | Cohen's d | $P_{adj}$ |
|------------------------------------------------|-----------|-----------|
| ASR - rule breaking                            | 0.89      | 9.39E-28  |
| SSAGA - conduct problem                        | 0.42      | 3.07E-07  |
| Picture vocabulary test score                  | -0.22     | 0.011     |
| Flanker test score                             | -0.12     | 0.178     |
| List sorting test score                        | 0.01      | 0.896     |
| Card sort test score                           | 0.12      | 0.178     |
| Pattern comparison test score                  | -0.02     | 0.879     |
| Picture sequence memory test score             | 0.01      | 0.896     |
| Reading recognition test score                 | -0.11     | 0.233     |
| Penn Progressive Matrices - Fluid intelligence | -0.09     | 0.343     |
| DDisc - AUC in small reward trails (\$200)     | -0.34     | 6.36E-05  |
| DDisc - AUC in large reward trails (\$400)     | -0.27     | 0.002     |
| NIH Toolbox - Sadness                          | 0.15      | 0.092     |
| NIH Toolbox - Life satisfaction                | -0.19     | 0.032     |
| NIH Toolbox - Meaning and Purpose              | -0.31     | 2.95E-04  |
| NIH Toolbox - Positive Affect                  | -0.06     | 0.494     |
| NIH Toolbox - Emotional Support                | -0.08     | 0.424     |
| NIH Toolbox - Instrumental Support             | -0.12     | 0.178     |
| NIH Toolbox - Perceived Stress                 | 0.19      | 0.029     |

Two-sided t-test was used for comparison, adjusting for age, sex and handedness. BH-FDR was used for multiple testing. ASR, Achenbach Adult Self Report; SSAGA, Semi-Structured Assessment for the Genetics of Alcoholism; DDisc, Delay discounting. A smaller AUC in DDisc indicates steep delay discounting. All the emotional responses were measured according to NIH Toolbox.

**Supplementary Table 5. Comparisons in neurobehavioral performances between SUDs and HCs in UKB.**

| Measurements                               | Cohen's d | $P_{adj}$ |
|--------------------------------------------|-----------|-----------|
| Risk taking                                | 0.21      | 1.30E-27  |
| Anhedonia                                  | 0.07      | 0.001     |
| Mood swings                                | 0.10      | 5.58E-07  |
| Irritability                               | 0.19      | 9.01E-22  |
| Sensitivity / hurt feelings                | 0.05      | 0.029     |
| Fed-up feelings                            | 0.07      | 4.90E-04  |
| Worry too long after embarrassment         | 0.02      | 0.374     |
| Suffer from 'nerves'                       | -0.02     | 0.302     |
| Pairs matching - incorrect matches         | 0.01      | 0.683     |
| Fluid intelligence                         | 0.002     | 0.932     |
| Matrix pattern completion - Correct number | -0.04     | 0.183     |
| Reaction time                              | -0.03     | 0.211     |
| Trail making - mean completion time        | 0.05      | 0.087     |
| Numeric memory                             | -0.06     | 0.052     |
| Tower rearranging test - correct rate      | -0.06     | 0.021     |
| Symbol digit substitution - correct rate   | -0.03     | 0.029     |

Two-sided t-test was used for comparison, adjusting for age, sex and handedness. BH-FDR was used for multiple testing. Fluid intelligence was calculated as the correct rate for participants who have answered at least half of the 13 questions.

**Supplementary Table 6. Cognitive terms selected from Neurosynth platform.**

|                     |                    |                     |                      |                       |                     |                     |
|---------------------|--------------------|---------------------|----------------------|-----------------------|---------------------|---------------------|
| affect              | affective          | anxiety             | anxiety disorders    | appraisal             | attentional control | awareness           |
| choice              | choices            | choose              | cognition            | cognitive             | cognitive control   | cognitive deficits  |
| cognitive emotional | cognitive function | cognitive functions | cognitive impairment | cognitive performance | cognitive processes | cognitive tasks     |
| cognitively         | conscious          | consciousness       | control network      | control processes     | control task        | controlled          |
| controlling         | daily life         | decision            | decision making      | decision task         | decisions           | effort              |
| effortful           | emotion regulation | emotional           | emotional faces      | emotional information | emotional responses | emotional stimuli   |
| emotional valence   | emotionally        | emotions            | everyday life        | executive control     | executive function  | executive functions |
| expectancy          | expectation        | expectations        | fear                 | fearful               | fearful faces       | gambling            |
| goal                | goal directed      | goals               | happy                | happy faces           | high risk           | impulsive           |
| impulsivity         | inhibit            | inhibition          | inhibitory           | inhibitory control    | judgment            | judgment task       |
| judgments           | life               | memory processes    | memory tasks         | memory wm             | monetary            | monetary incentive  |
| monetary reward     | monitoring         | mood                | motivation           | motivational          | negative affect     | negative emotional  |
| negative emotions   | nogo               | prediction          | prediction error     | predictions           | predictive          | preference          |
| preferences         | probabilistic      | probability         | reappraisal          | reference             | referential         | referred            |
| response inhibition | reward             | reward anticipation | rewarding            | rewards               | risk                | risk taking         |
| risky               | self referential   | self report         | self reported        | shifting              | shifts              | social              |
| social cognition    | social cognitive   | social interaction  | social interactions  | socially              | stop signal         | stress              |
| stress disorder     | stroop             | stroop task         | subjective           | suppressed            | suppression         | switch              |
| switching           | unexpected         | value               | values               | wm                    | wm task             | working memory      |

**Supplementary Table 7. Correlations between longitudinal GMV changes and the severity of SUD.**

| ROI                            | Correlation ( $P_{adj}$ ) |              |              |
|--------------------------------|---------------------------|--------------|--------------|
|                                | Alcohol                   | Marijuana    | Other drugs  |
| Left_Accumbens_area            | -0.05 (0.78)              | 0.03 (0.91)  | -0.18 (0.78) |
| Right_Accumbens_area           | -0.03 (0.87)              | -0.12 (0.68) | 0.07 (0.87)  |
| Left_Amygdala                  | 0.03 (0.87)               | -0.03 (0.91) | 0.04 (0.87)  |
| Right_Amygdala                 | -0.01 (0.87)              | -0.1 (0.72)  | 0.34 (0.47)  |
| Left_Caudate                   | 0.02 (0.87)               | 0.08 (0.78)  | 0.06 (0.87)  |
| Right_Caudate                  | -0.01 (0.87)              | 0.22 (0.45)  | 0.13 (0.78)  |
| Left_Hippocampus               | 0.004 (0.93)              | 0.14 (0.61)  | 0.12 (0.78)  |
| Right_Hippocampus              | 0.03 (0.87)               | -0.06 (0.83) | 0.17 (0.78)  |
| Left_Putamen                   | 0.04 (0.87)               | 0.19 (0.47)  | 0.03 (0.87)  |
| Right_Putamen                  | 0.07 (0.44)               | 0.02 (0.91)  | 0.14 (0.78)  |
| Left_lateralorbitofrontal      | -0.09 (0.42)              | -0.21 (0.46) | -0.13 (0.78) |
| Right_lateralorbitofrontal     | -0.08 (0.42)              | -0.12 (0.68) | -0.33 (0.47) |
| Left_medialorbitofrontal       | -0.01 (0.93)              | -0.19 (0.47) | 0.03 (0.87)  |
| Right_medialorbitofrontal      | -0.11 (0.31)              | -0.14 (0.61) | -0.03 (0.87) |
| Left_frontalpole               | 0.02 (0.87)               | 0.08 (0.78)  | 0.07 (0.87)  |
| Right_frontalpole              | -0.02 (0.87)              | -0.01 (0.93) | -0.16 (0.78) |
| Left_superiorfrontal           | -0.06 (0.49)              | -0.26 (0.45) | -0.11 (0.78) |
| Right_superiorfrontal          | -0.08 (0.42)              | -0.26 (0.45) | -0.16 (0.78) |
| Left_rostralanteriorcingulate  | -0.1 (0.31)               | -0.24 (0.45) | 0.22 (0.78)  |
| Right_rostralanteriorcingulate | -0.02 (0.87)              | -0.15 (0.61) | -0.07 (0.87) |
| Left_caudalanteriorcingulate   | -0.03 (0.87)              | -0.07 (0.78) | 0.17 (0.78)  |
| Right_caudalanteriorcingulate  | -0.07 (0.44)              | -0.3 (0.45)  | -0.15 (0.78) |

As only 9 participants were left with neuroimaging measurements available at both BL and FU2, and an FTND score greater than 0, correlation results between FTND score, which represented the severity of tobacco use, and GMV changes were not provided. BH-FDR method was used for multiple testing.

**Supplementary Table 8. Comparisons in neurobehavioral performances at baseline between follow-up SUDs and follow-up HCs in ABCD and IMAGEN.**

| Measurements                                             | Cohen's d | $P_{adj}$ |
|----------------------------------------------------------|-----------|-----------|
| <b>ABCD</b>                                              |           |           |
| CBCL - rule breaking                                     | 0.03      | 0.256     |
| CBCL - conduct score                                     | 0.02      | 0.435     |
| CBCL - stress score                                      | 3.40E-4   | 0.986     |
| BIS/BAS - fun seeking score                              | 0.09      | 5.79E-06  |
| UPPS-P total impulsivity score                           | 0.18      | 1.02E-19  |
| SST - stop signal reaction time (integration estimation) | 0.00      | 0.940     |
| MID - Positive rate in small reward trails               | 0.04      | 0.435     |
| MID - Positive rate in large reward trails               | 0.09      | 0.031     |
| <b>IMAGEN</b>                                            |           |           |
| Conduct problem                                          | 0.20      | 0.005     |
| TCI - disorderliness vs. regimentation                   | 0.37      | 8.50E-08  |
| TCI - novelty seeking total score                        | 0.46      | 1.79E-11  |
| CGT - delay aversion                                     | -0.02     | 0.874     |
| CGT - deliberation time                                  | -8.58E-4  | 0.990     |
| CGT - overall proportion bet                             | 0.06      | 0.724     |
| CGT - quality of decision making                         | -0.07     | 0.679     |
| CGT - risk adjustment                                    | -0.05     | 0.724     |
| CGT - risk taking                                        | 0.05      | 0.724     |
| SST - stop signal reaction time                          | 0.11      | 0.268     |
| SURPS - sensation seeking                                | 0.34      | 5.33E-07  |
| SURPS - impulsivity                                      | 0.20      | 0.005     |
| KIRBY - k                                                | -0.05     | 0.724     |
| KIRBY - k for small LDRs                                 | -0.03     | 0.874     |
| KIRBY - k for Medium LDRs                                | -0.02     | 0.874     |
| KIRBY - k for Large LDRs                                 | -0.02     | 0.874     |

Two-sided t-test was used for comparison, adjusting for age, sex and handedness. BH-FDR was used for multiple testing within studies. CBCL, Child Behavior Check List; BIS/BAS, Behavioral inhibition and Behavioral Activations scales; SST, Stop Signal Test; MID, Monetary Incentive Delay task; TCI, Temperament and Character Inventory; CGT, Cambridge Guessing Task; KIRBY, Monetary-Choice Questionnaire. All the rate calculations in reward trails were adjusted for the corresponding rate in neural trails.



**Supplementary Table 9. Demographic characteristics of the samples in validation samples.**

| NKI-RS ( <i>n</i> =1112) |                     |                     |          |
|--------------------------|---------------------|---------------------|----------|
|                          | HC ( <i>n</i> =862) | SU ( <i>n</i> =250) | <i>P</i> |
| Age                      | 42.96 (20.06)       | 41.42 (17.67)       | 0.272    |
| Gender                   |                     |                     | <0.001   |
| Male                     | 296 (34.3%)         | 122 (48.8%)         |          |
| Female                   | 566 (65.7%)         | 128 (51.2%)         |          |
| Handedness               |                     |                     | 0.596    |
| Right                    | 771 (89.4%)         | 220 (88.0%)         |          |
| Left                     | 91 (10.6%)          | 30 (12.0%)          |          |
| Ethnics                  |                     |                     | 0.017    |
| White                    | 623 (72.4%)         | 195 (78.9%)         |          |
| Black                    | 150 (17.4%)         | 41 (16.6%)          |          |
| SES                      | 6.82 (2.37)         | 6.28 (2.74)         | 0.006    |
| IQ                       | 101.57 (13.43)      | 100.52 (13.20)      | 0.277    |
|                          |                     |                     |          |
|                          |                     |                     |          |
|                          |                     |                     |          |
|                          |                     |                     |          |
|                          |                     |                     |          |
|                          |                     |                     |          |
|                          |                     |                     |          |

| Cam-CAN ( <i>n</i> =445) |                     |                     |          |
|--------------------------|---------------------|---------------------|----------|
|                          | HC ( <i>n</i> =140) | SU ( <i>n</i> =250) | <i>P</i> |
| Age                      | 54.97 (18.83)       | 55.80 (17.86)       | 0.654    |
| Gender                   |                     |                     |          |
| Male                     | 47 (33.6%)          | 171 (56.1%)         | <0.001   |
| Female                   | 93 (66.4%)          | 134 (43.9%)         |          |
| Handedness               |                     |                     |          |
| Right                    | 129 (92.1%)         | 272 (89.2%)         | 0.478    |
| Left                     | 7 (5.0%)            | 25 (8.2%)           |          |
| Mixed                    | 4 (2.9%)            | 8 (2.6)             |          |
| Ethnics                  |                     |                     |          |
| White                    | 128 (92.1%)         | 300 (98.4%)         | 0.003    |
| Other                    | 11 (7.9%)           | 5 (1.6%)            |          |
| SES                      |                     |                     | 0.025    |
| A                        | 24 (17.1%)          | 75 (24.6%)          |          |
| B                        | 34 (24.3%)          | 61 (20.0%)          |          |
| C                        | 32 (22.9%)          | 78 (25.6%)          |          |
| D                        | 32 (22.9%)          | 44 (14.4%)          |          |
| E                        | 10 (7.1%)           | 12 (3.9%)           |          |
| F                        | 8 (5.7%)            | 35 (11.5%)          |          |
| IQ                       | 30.94 (7.14)        | 32.37 (6.48%)       | 0.039    |

| BRAINMINT ( <i>n</i> =570) |                     |                     |          |
|----------------------------|---------------------|---------------------|----------|
|                            | HC ( <i>n</i> =414) | SU ( <i>n</i> =156) | <i>P</i> |
| Age                        | 16.6 (3)            | 19 (2.1)            | <0.001   |
| Gender                     |                     |                     | 0.55     |
| Male                       | 121 (29,2%)         | 41 (26,3%)          |          |
| Female                     | 293 (70,8%)         | 115 (73,7%)         |          |
| Handedness                 |                     |                     | 1        |
| Right                      | 375 (90,5%)         | 141 (90,4%)         |          |

|       |           |           |  |
|-------|-----------|-----------|--|
| Left  | 35 (8,5%) | 15 (9.6%) |  |
| Mixed | 4 (1%)    | 0 (0%)    |  |

Continuous variables were provided as mean(s.d.) and discrete variables were provided as n(%). In CamCAN, handedness is determined by the handedness score:  $\text{homeint\_handedness} > 50$  – Right-handed;  $\text{homeint\_handedness} < -50$  – Left-handed;  $-50 \leq \text{homeint\_handedness} \leq 50$  – Mixed-handed.
